# Supplementary material for: Antitumor Activity of Simvastatin in Preclinical Models of Mantle Cell Lymphoma
Source: MDPI journal article supplement (doi:10.3390/cancers14225601), 2022-11-15
Supplement: s1 [file s1]

# Supplementary Materials: Antitumor Activity of Simvastatin in Preclinical Models of Mantle Cell Lymphoma

Juliana Carvalho Santos, Núria Profitós-Pelejà, Marcelo Lima Ribeiro and Gaël Roué

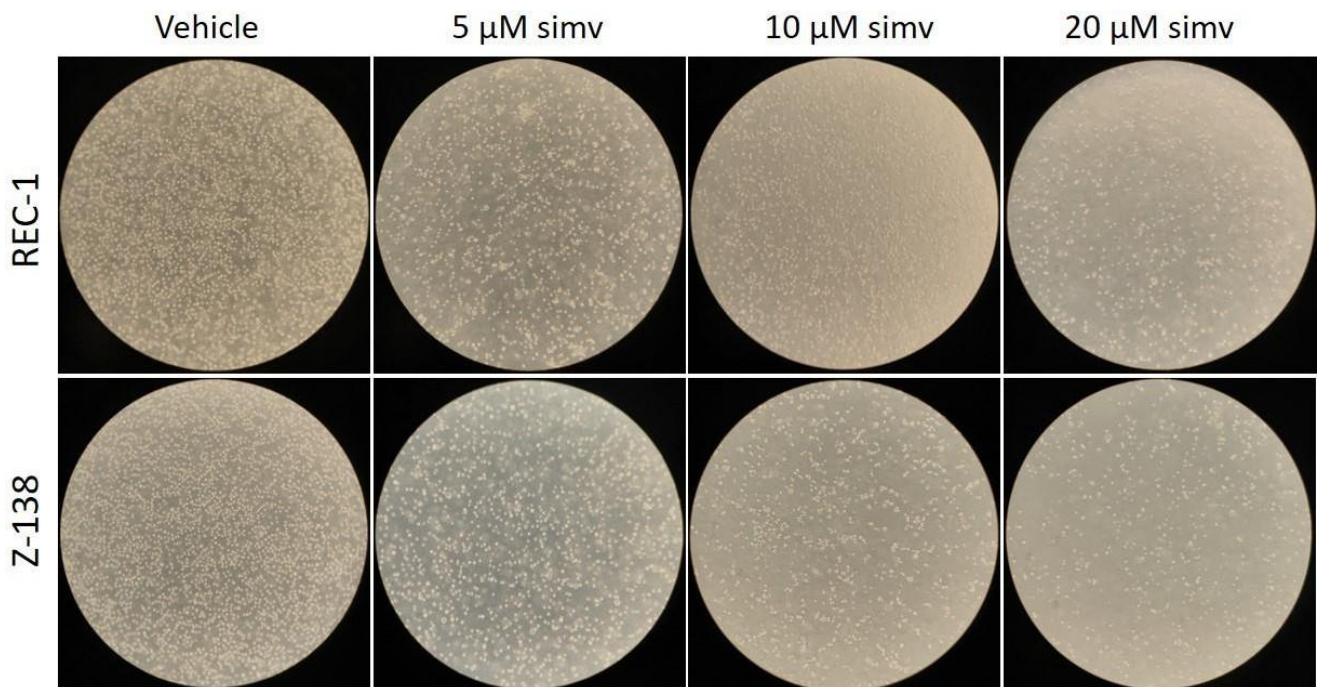

**Figure S1.** Representative bright field pictures of REC-1 and Z-138 cultures exposed for 3 days to increasing doses of simvastatin.

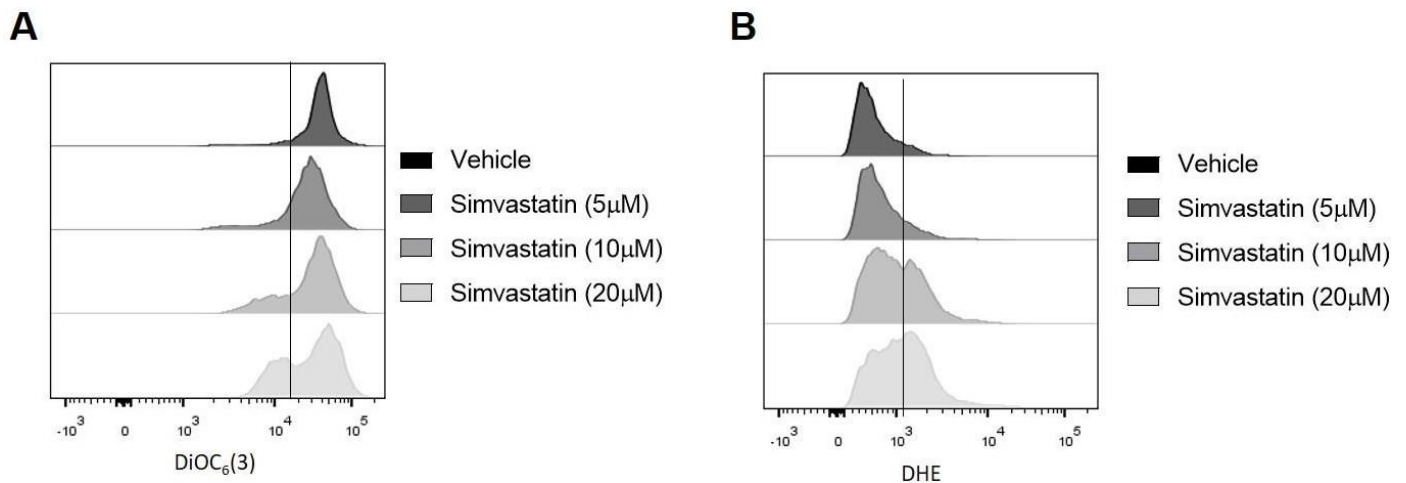

**Figure S2.** Representative FACS images of REC-1 and Z-138 cell lines treated with simvastatin or vehicle for 48 h analyzed by DiOC<sub>6</sub> (A) and dihydroethidium (B) staining.

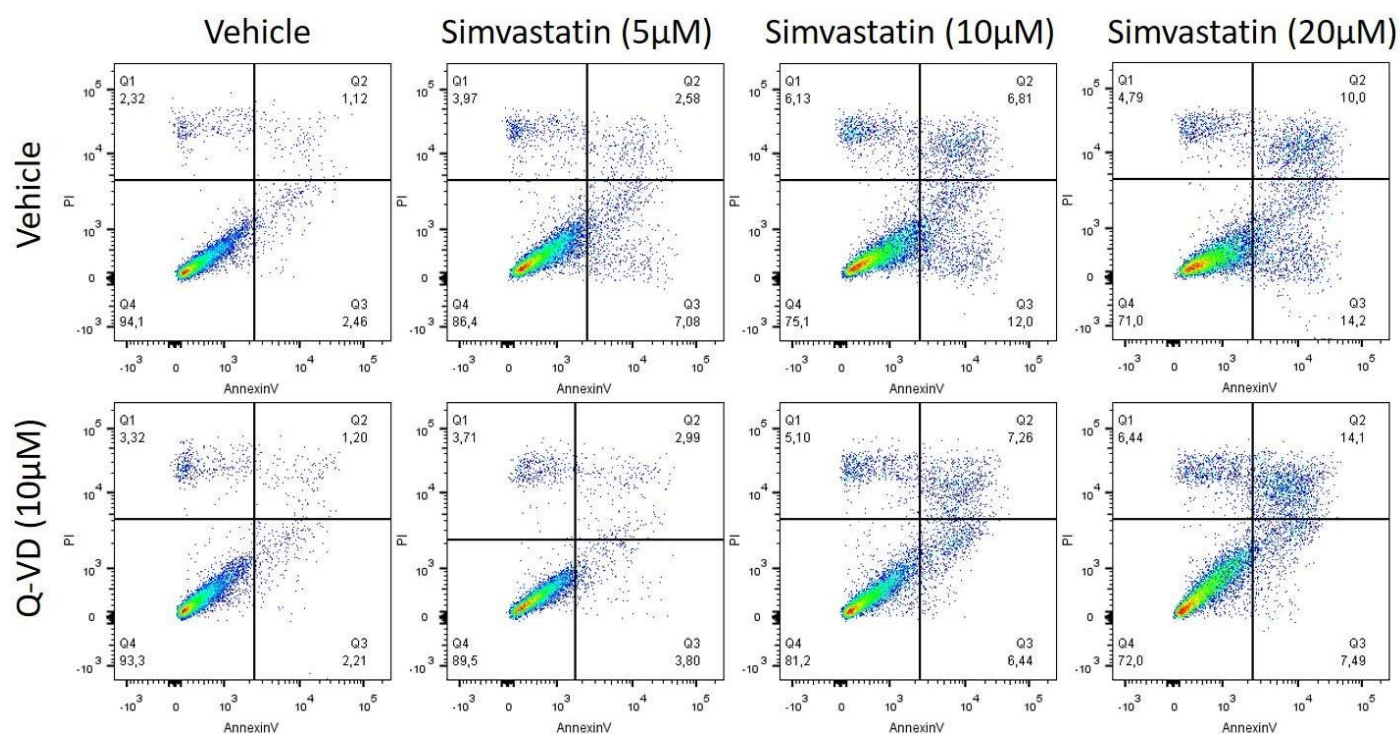

**Figure S3.** Representative FACS images of REC-1 and Z-138 cell lines treated with simvastatin or vehicle for 48 h analyzed by Annexin V-FITC/propidium iodide staining.

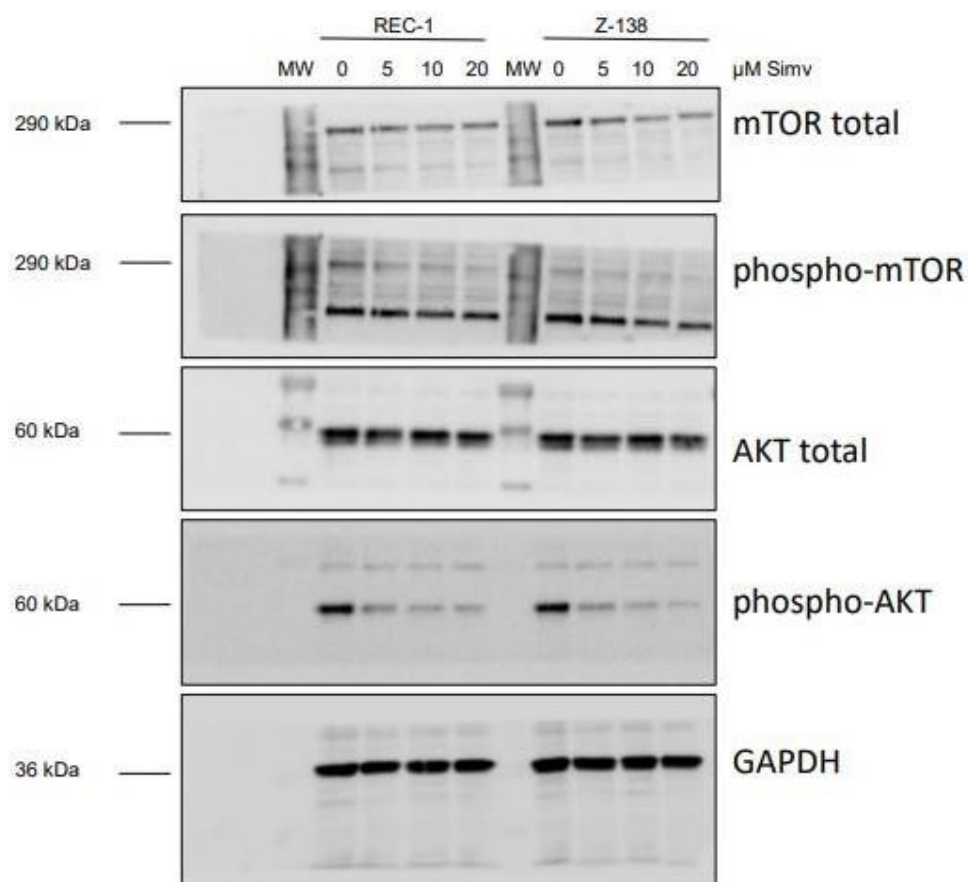

**Figure S4.** Full Western blot images.
